# Supplementary material
Source: PubMed Central journal article supplement (PMC3155010)
Supplement: NIHMS302799-supplement-Supp_Figure_S1.pdf [file NIHMS302799-supplement-Supp_Figure_S1.pdf]

Supplemental Material

Fig. S1.

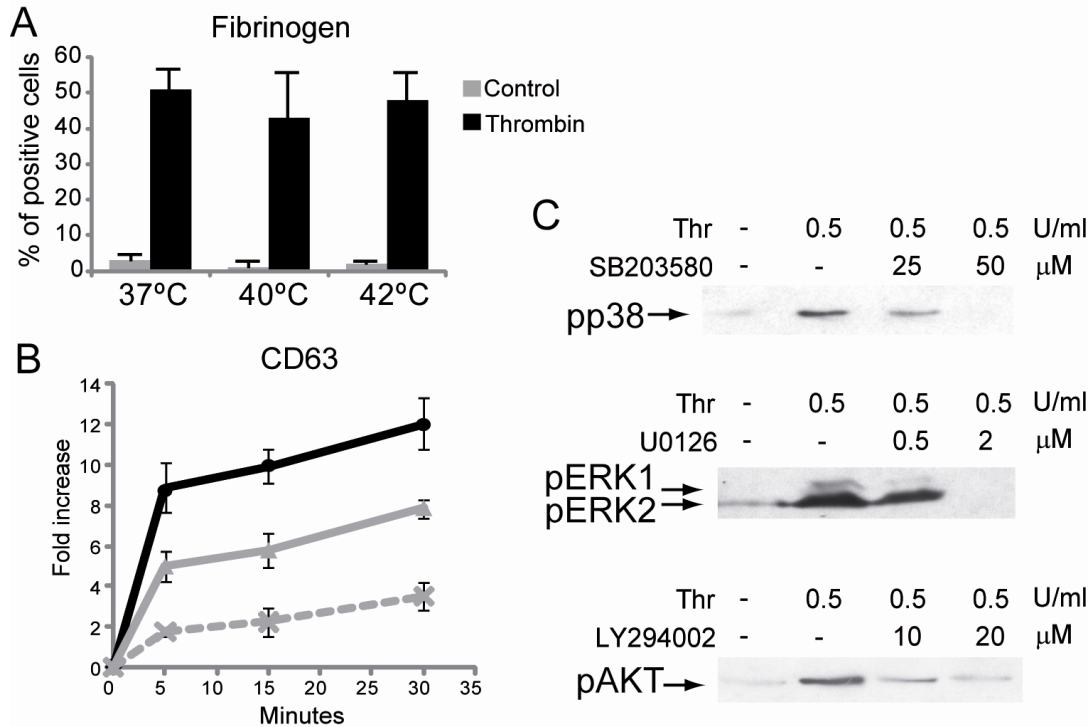

Fig. S1. A) Alexa 488-conjugated fibrinogen alone was preincubated at 37°, 40° or 42°C for 10 minutes before adding it to platelet suspensions. Washed platelets (WPs) were then stimulated with thrombin (0.05 U/ml) at room temperature for 5 minutes. Analysis of fibrinogen binding were performed by flow cytometry (n=3). B) WPs were preincubated at 37° (dark line), 40° (grey line) or 42°C (dashed line) for 10 minutes and then stimulated with thrombin (0.05 U/ml) for the indicated length of time. CD63 was detected by flow cytometry (n=4) and results are expressed as fold increase vs. unstimulated controls at the same temperature. C) WPs were preincubated with SB203580, U0126 or LY294002 for 10 minutes and then stimulated with thrombin for 5 minutes. Lysates were immunoblotted with anti-pp38, pERK1/2 or pAKT antibody.
